# Supplementary material
Source: PubMed Central journal article supplement (PMC2885233)
Supplement: supp_M109.086074_jbc.M109.086074-1.pdf [file supp_M109.086074_jbc.M109.086074-1.pdf]

# Identification of property outliers among ALS-associated SOD1 mutations

## COMMON EFFECT ON SURFACE HYDROGEN BONDS

### SUPPLEMENTARY MATERIAL

Table S1. Urea and thermal denaturation data used to plot  $\Delta\Delta G^{\text{norm}}$  versus disease progression ( $ST$ ) (Fig. 5). The stability data was normalized prior to comparison.  $ST$  is the mean survival time after first diagnosis and  $n$  is the number of patients in the data set.

| Genotype | $\Delta\Delta G_{\text{D-N}}$<br>(kcal/mol)<br>(1) | $\Delta\Delta G^{\text{norm}}$ | $\Delta T_m$<br>(°K)<br>(2) | $\Delta T_m$<br>(°K)<br>(3) | $\Delta T_m$<br>(°K)<br>(4) | $\Delta T_m$<br>(°K)<br>(5) | $\Delta T_m$<br>(°K)<br>(6) | $ST$<br>(years) | $n$ |
|----------|----------------------------------------------------|--------------------------------|-----------------------------|-----------------------------|-----------------------------|-----------------------------|-----------------------------|-----------------|-----|
| A4V      | -4.31                                              | 0.85                           | -12.01                      | -12.4                       | -8.9                        | -                           | -                           | 1.2             | 205 |
| V7E      | -                                                  | 0.52                           | -6.58                       | -                           | -                           | -                           | -                           | 5.7             | 3   |
| G37R     | -                                                  | 0.55                           | -7.13                       | -                           | -                           | -                           | -                           | 17.0            | 27  |
| L38V     | -3.24                                              | 0.71                           | -9.57                       | -                           | -                           | -                           | -                           | 2.4             | 22  |
| G41D     | -3.47                                              | 0.80                           | -                           | -                           | -                           | -                           | -                           | 14.1            | 15  |
| G41S     | -4.47                                              | 0.96                           | -                           | -                           | -                           | -                           | -                           | 1.0             | 16  |
| H43R     | -4.05                                              | 0.91                           | -                           | -                           | -                           | -                           | -                           | 1.8             | 12  |
| H46R     | 0.48                                               | 0.03                           | 3.64                        | -                           | -                           | -                           | -                           | 17.6            | 49  |
| H48Q     | -                                                  | 0.45                           | -5.18                       | -                           | -                           | -                           | -                           | 1.2             | 4   |
| D76V     | -0.06                                              | 0.15                           | -                           | -                           | -                           | -                           | -                           | 18.8            | 4   |
| D76Y     | -0.09                                              | 0.16                           | -                           | -                           | -                           | -                           | -                           | 9.0             | 2   |
| L84V     | -2.65                                              | 0.69                           | -10.73                      | -                           | -                           | -                           | -                           | 3.2             | 10  |
| G85R     | -0.92                                              | 0.35                           | -3.63                       | -                           | -                           | -                           | -3.8                        | 6.0             | 11  |
| N86D     | -0.94                                              | 0.32                           | -                           | -                           | -                           | -                           | -                           | -               | 0   |
| N86K     | -1.41                                              | 0.41                           | -                           | -                           | -                           | -                           | -                           | 1.7             | 7   |
| N86S     | -0.45                                              | 0.28                           | -2.97                       | -                           | -                           | -                           | -                           | 6.8             | 4   |
| D90A     | -0.65                                              | 0.26                           | -                           | -                           | -                           | -                           | -                           | 8.0             | 15  |
| D90V     | -1.85                                              | 0.49                           | -                           | -                           | -                           | -                           | -                           | 2.7             | 3   |
| G93A     | -2.97                                              | 0.70                           | -9.5                        | -10.5                       | -10.5                       | -                           | -                           | 3.1             | 16  |
| G93D     | -                                                  | 0.84                           | -                           | -                           | -                           | -12.8                       | -                           | 8.8             | 7   |
| G93R     | -                                                  | 0.60                           | -8.23                       | -                           | -3.3                        | -10.1                       | -10.1                       | 5.3             | 4   |
| G93S     | -                                                  | 0.61                           | -                           | -                           | -                           | -8.3                        | -                           | 8.0             | 11  |
| G93V     | -                                                  | 1.00                           | -                           | -                           | -                           | -15.9                       | -                           | 6.0             | 12  |
| E100G    | -2.22                                              | 0.52                           | -12.56                      | -                           | -7.8                        | -                           | -7.7                        | 4.7             | 50  |
| E100K    | -                                                  | 0.30                           | -2.18                       | -                           | -                           | -                           | -                           | 10.0            | 1   |
| D101G    | -1.39                                              | 0.40                           | -                           | -                           | -                           | -                           | -                           | 1.9             | 3   |

|       |       |      |       |   |   |   |       |      |    |
|-------|-------|------|-------|---|---|---|-------|------|----|
| D101N | 0.75  | 0.10 | -0.09 | - | - | - | -     | 2.3  | 17 |
| I104F | -1.24 | 0.37 | -     | - | - | - | -     | 21.3 | 3  |
| S105L | -2.60 | 0.63 | -     | - | - | - | -     | 3.5  | 7  |
| L106V | -3.62 | 0.82 | -     | - | - | - | -     | 1.9  | 6  |
| I113T | -2.48 | 0.68 | -9.79 | - | - | - | -12.2 | 4.3  | 38 |
| G114A | -3.27 | 0.76 | -     | - | - | - | -     | 2.7  | 2  |
| D124V | -     | 0.01 | 3.42  | - | - | - | -     | -    | 0  |
| D125H | -     | 0.21 | -0.53 | - | - | - | -     | 1.8  | 2  |
| S134N | -     | 0.23 | -0.9  | - | - | - | -     | 1.2  | 3  |
| N139D | 0.36  | 0.07 | -     | - | - | - | -     | -    | -  |
| N139K | -0.24 | 0.24 | -2.12 | - | - | - | -     | -    | -  |
| L144F | -1.89 | 0.46 | -4.29 | - | - | - | -     | 11.8 | 15 |
| L144S | -1.07 | 0.36 | -3.65 | - | - | - | -     | 12.3 | 2  |
| V148G | -4.56 | 1.00 | -     | - | - | - | -     | 2.1  | 11 |

1. Lindberg, M. J., Bystrom, R., Boknas, N., Andersen, P. M., and Oliveberg, M. (2005) *Proc Natl Acad Sci U S A* **102**(28), 9754-9759
2. Rodriguez, J. A., Shaw, B. F., Durazo, A., Sohn, S. H., Doucette, P. A., Nersissian, A. M., Faull, K. F., Eggers, D. K., Tiwari, A., Hayward, L. J., and Valentine, J. S. (2005) *Proc Natl Acad Sci U S A* **102**(30), 10516-10521
3. Furukawa, Y., and O'Halloran, T. V. (2005) *J Biol Chem* **280**(17), 17266-17274
4. Stathopoulos, P. B., Rumfeldt, J. A., Scholz, G. A., Irani, R. A., Frey, H. E., Hallewell, R. A., Lepock, J. R., and Meiering, E. M. (2003) *Proc Natl Acad Sci U S A* **100**(12), 7021-7026
5. Stathopoulos PB, R. J., Karbassi F, Siddall CA, Lepock JR, Meiering EM. (2006) *J Biol Chem* **281**(10), 6184-6193
6. Vassall, K. A., Stathopoulos, P. B., Rumfeldt, J. A. O., Lepock, J. R., and Meiering, E. M. (2006) *Biochemistry* **45**(23), 7366-7379

**Table S2.** The reference set of 75 confirmed ALS associated SOD1 mutations with fast and slow disease progression as listed in (1). *n* is the number of reported patients for each mutation. The mutants measured in this study are in bold letters.

| Mutant                    | Fast <5 years | <i>n</i> | Slow >5years | <i>n</i> |
|---------------------------|---------------|----------|--------------|----------|
| A4S                       | >3            | 0        |              |          |
| A4T                       | 1,5           | 21       |              |          |
| A4V                       | 1,2           | 205      |              |          |
| C6F                       | 1             | 1        |              |          |
| C6G                       | 0,2           | 2        |              |          |
| V7E <sup>1</sup>          |               |          | 5,7          | 3        |
| L8Q                       | 1,6           | 5        |              |          |
| G10V                      | 1,1           | 5        |              |          |
| G12A                      | >4            | 0        |              |          |
| G12R <sup>2</sup>         |               |          | 5,5          | 2        |
| V14G                      | 1,7           | 1        |              |          |
| N19S                      | 2,1           | 3        |              |          |
| F20C                      | 2             | 7        |              |          |
| E21G <sup>2</sup>         |               |          | 17,2         | 5        |
| G37R <sup>2</sup>         |               |          | 17           | 27       |
| L38R <sup>2</sup>         | >2            | 0        |              |          |
| <b>L38V</b>               | 2,4           | 22       |              |          |
| G41D <sup>1</sup>         |               |          | 14,1         | 15       |
| G41S                      | 1             | 16       |              |          |
| H43R <sup>2</sup>         | 1,8           | 12       |              |          |
| F45C                      |               |          | >6           | 0        |
| H46R <sup>2</sup>         |               |          | 17,6         | 49       |
| H48Q                      | 1,2           | 4        |              |          |
| N65S                      |               |          | >14          | 0        |
| G72C                      | 4,4           | 1        |              |          |
| G72S                      | 3,3           | 2        |              |          |
| <b>D76V</b> <sup>2</sup>  |               |          | 18,8         | 4        |
| <b>D76Y</b> <sup>2</sup>  |               |          | 11           | 2        |
| L84F                      |               |          | 5,8          | 18       |
| L84V                      | 3,2           | 10       |              |          |
| G85R <sup>2</sup>         |               |          | 6            | 11       |
| <b>N86D</b> <sup>1</sup>  | >4            | 0*       |              |          |
| <b>N86K</b> <sup>2</sup>  | 1,7           | 7        |              |          |
| <b>N86S</b>               |               |          | 6,8          | 4        |
| A89V                      | >3,8          | 0        |              |          |
| D90A <sup>2</sup>         |               |          | 8            | 15       |
| <b>D90V</b> <sup>2</sup>  | 2,7           | 3        |              |          |
| G93A                      | 3,1           | 16       |              |          |
| G93C                      |               |          | 12,1         | 27       |
| G93D <sup>1</sup>         |               |          | 8,8          | 7        |
| G93R <sup>2</sup>         |               |          | 5,3          | 4        |
| G93S                      |               |          | 8            | 11       |
| G93V                      |               |          | 6            | 2        |
| E100G <sup>2</sup>        | 4,7           | 50       |              |          |
| E100K <sup>2</sup>        |               |          | 10           | 1        |
| <b>D101G</b> <sup>2</sup> | 1,9           | 3        |              |          |
| D101H <sup>2</sup>        | 1,2           | 2        |              |          |
| <b>D101N</b> <sup>2</sup> | 2,3           | 17       |              |          |
| D101Y <sup>2</sup>        | 0,9           | 1        |              |          |

|                    |     |    |      |    |
|--------------------|-----|----|------|----|
| I104F              |     |    | 21,3 | 3  |
| <b>S105L</b>       | 3,5 | 7  |      |    |
| L106V              | 1,9 | 6  |      |    |
| G108V              | 4   | 2  |      |    |
| I112M              | 3   | 9  |      |    |
| I112T              | 0,9 | 2  |      |    |
| I113F              |     |    | >6   | 0  |
| I113T              | 4,3 | 38 |      |    |
| <b>G114A</b>       | 2,7 | 2  |      |    |
| R115G <sup>1</sup> | 2,5 | 2  |      |    |
| D124V <sup>2</sup> | >2  | 0  |      |    |
| D125H <sup>2</sup> | 1,8 | 2  |      |    |
| L126S              |     |    | 8    | 5  |
| L126X              | 3,8 | 14 |      |    |
| S134N              | 1,2 | 3  |      |    |
| N139H              | 3   | 6  |      |    |
| A140G              |     |    | 10   | 1  |
| G141E <sup>1</sup> | 3,5 | 2  |      |    |
| L144F              |     |    | 11,8 | 15 |
| <b>L144S</b>       |     |    | 12,3 | 2  |
| A145T              | 1,6 | 2  |      |    |
| C146R <sup>2</sup> | 2,8 | 2  |      |    |
| V148G              | 2,1 | 11 |      |    |
| V148I              | 1,7 | 5  |      |    |
| I149T              | 2,7 | 15 |      |    |
| I151T              |     |    | 20   | 1  |

<sup>1</sup>Increase of the net repulsive charge (blue in plot). <sup>2</sup>Decrease of the net repulsive charge (red in plot).  
<sup>\*</sup>Patient still alive and displays a slow disease progression (P.M. Andersen, unpublished data).

1. Wang, Q., Johnson, J. L., Agar, N. Y. R., & Agar, J. N. (2008) Protein aggregation and protein instability govern familial amyotrophic lateral sclerosis patient survival *Plos Biology* 6: 1508-1526.

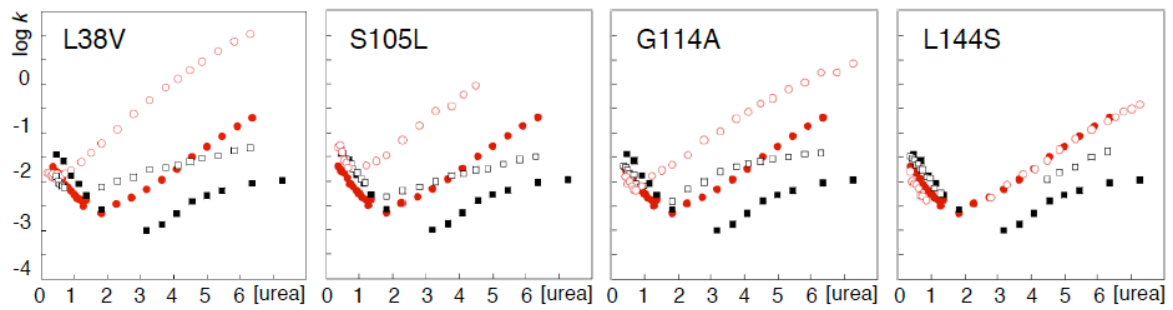

Supplementary Fig. 1. Chevron plots of L38V, S105L, G114A and L144S.

$\text{apoSOD1}_{\text{mono}}^{\text{pWT}}$   $\text{apoSOD1}_{\text{mono}}^{\text{pWT}}$  (●),  $\text{apoSOD1}_{\text{mono}}^{\text{mut}}$   $\text{apoSOD1}_{\text{mono}}^{\text{mut}}$  (○),  $\text{apoSOD1}_{\text{dimer}}^{\text{pWT}}$   $\text{apoSOD1}_{\text{dimer}}^{\text{pWT}}$  (■) and  $\text{apoSOD1}_{\text{dimer}}^{\text{mut}}$   $\text{apoSOD1}_{\text{dimer}}^{\text{mut}}$  (□).
